# Supplementary figures and images for: Esterification of 1-hexene and acetic acid catalyzed by a modified resin with a Lewis acid
Source: Royal Society of Chemistry journal article supplement (doi:10.1039/d1se01738a), 2022-01-01

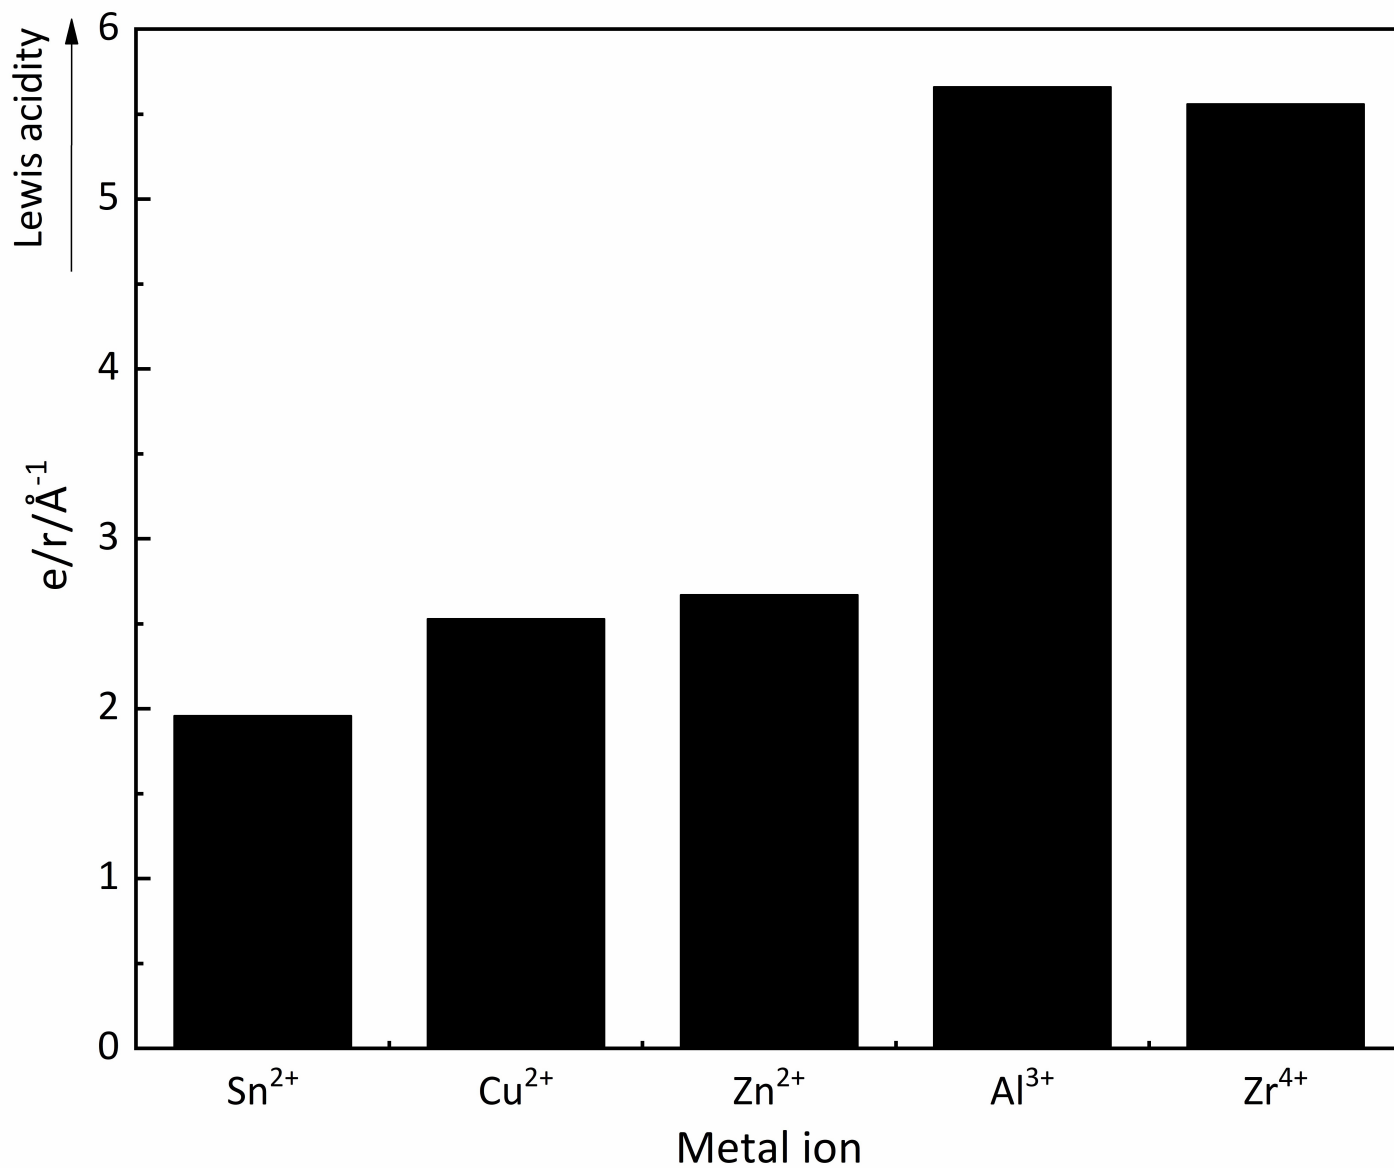

Supplement: d1se01738a1.pdf [file d1se01738a1.pdf]

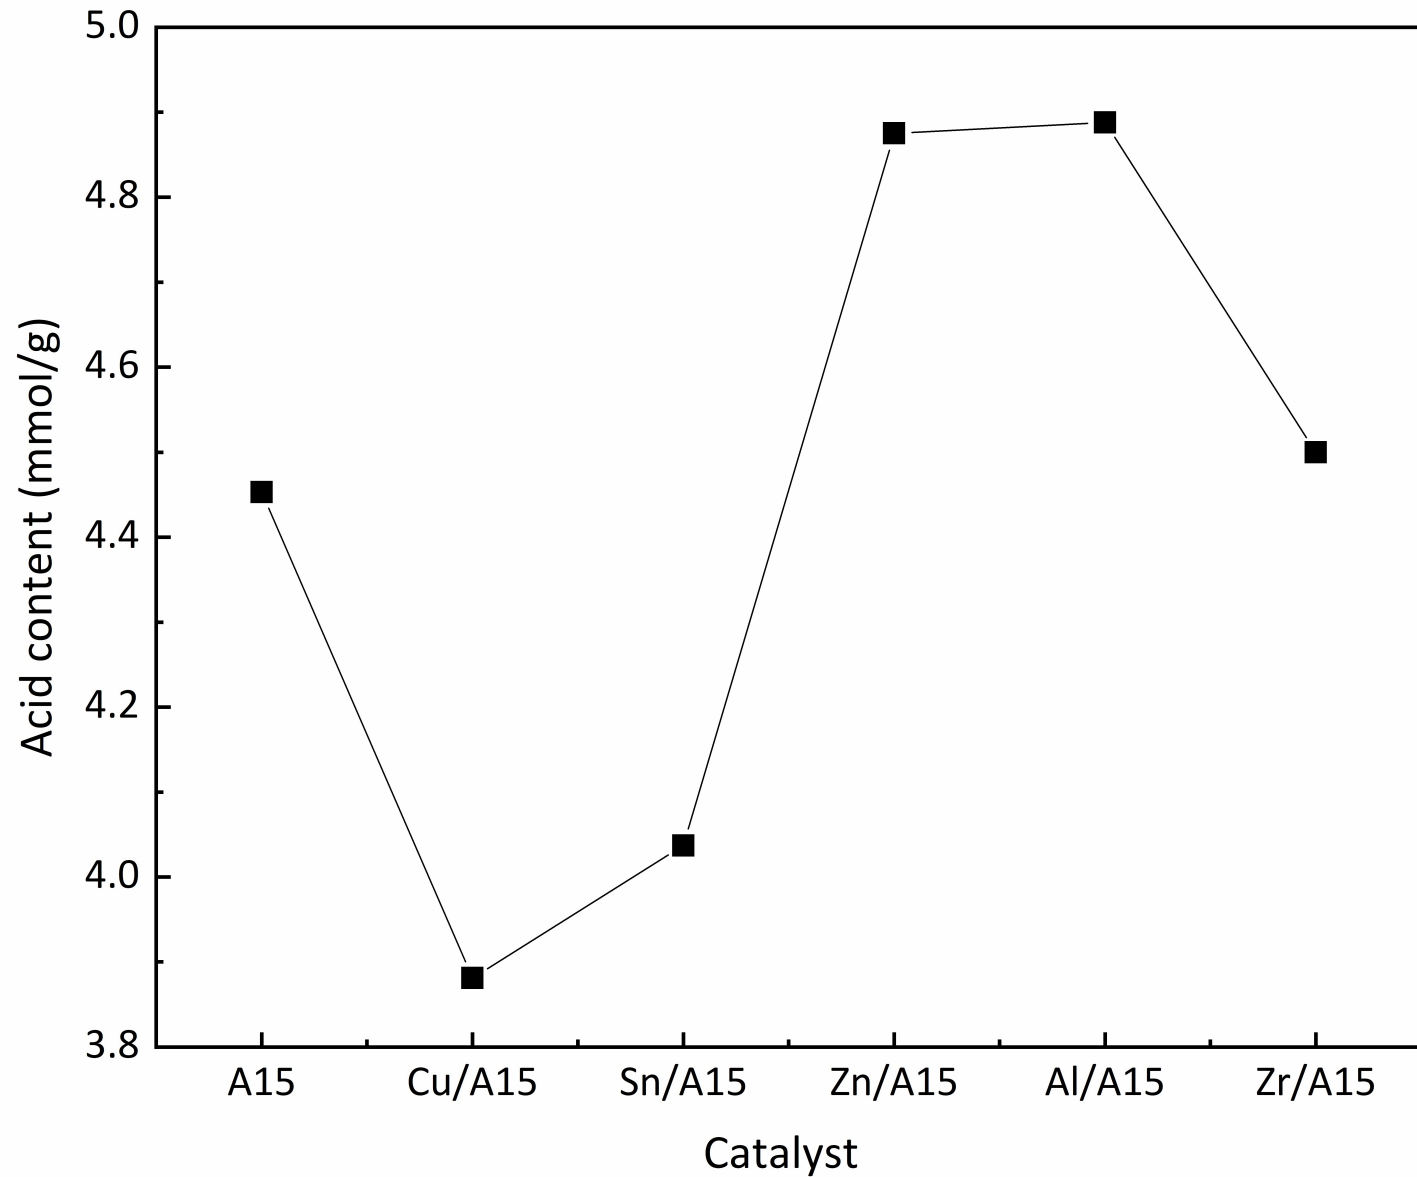

Supplement: d1se01738a2.pdf [file d1se01738a2.pdf]

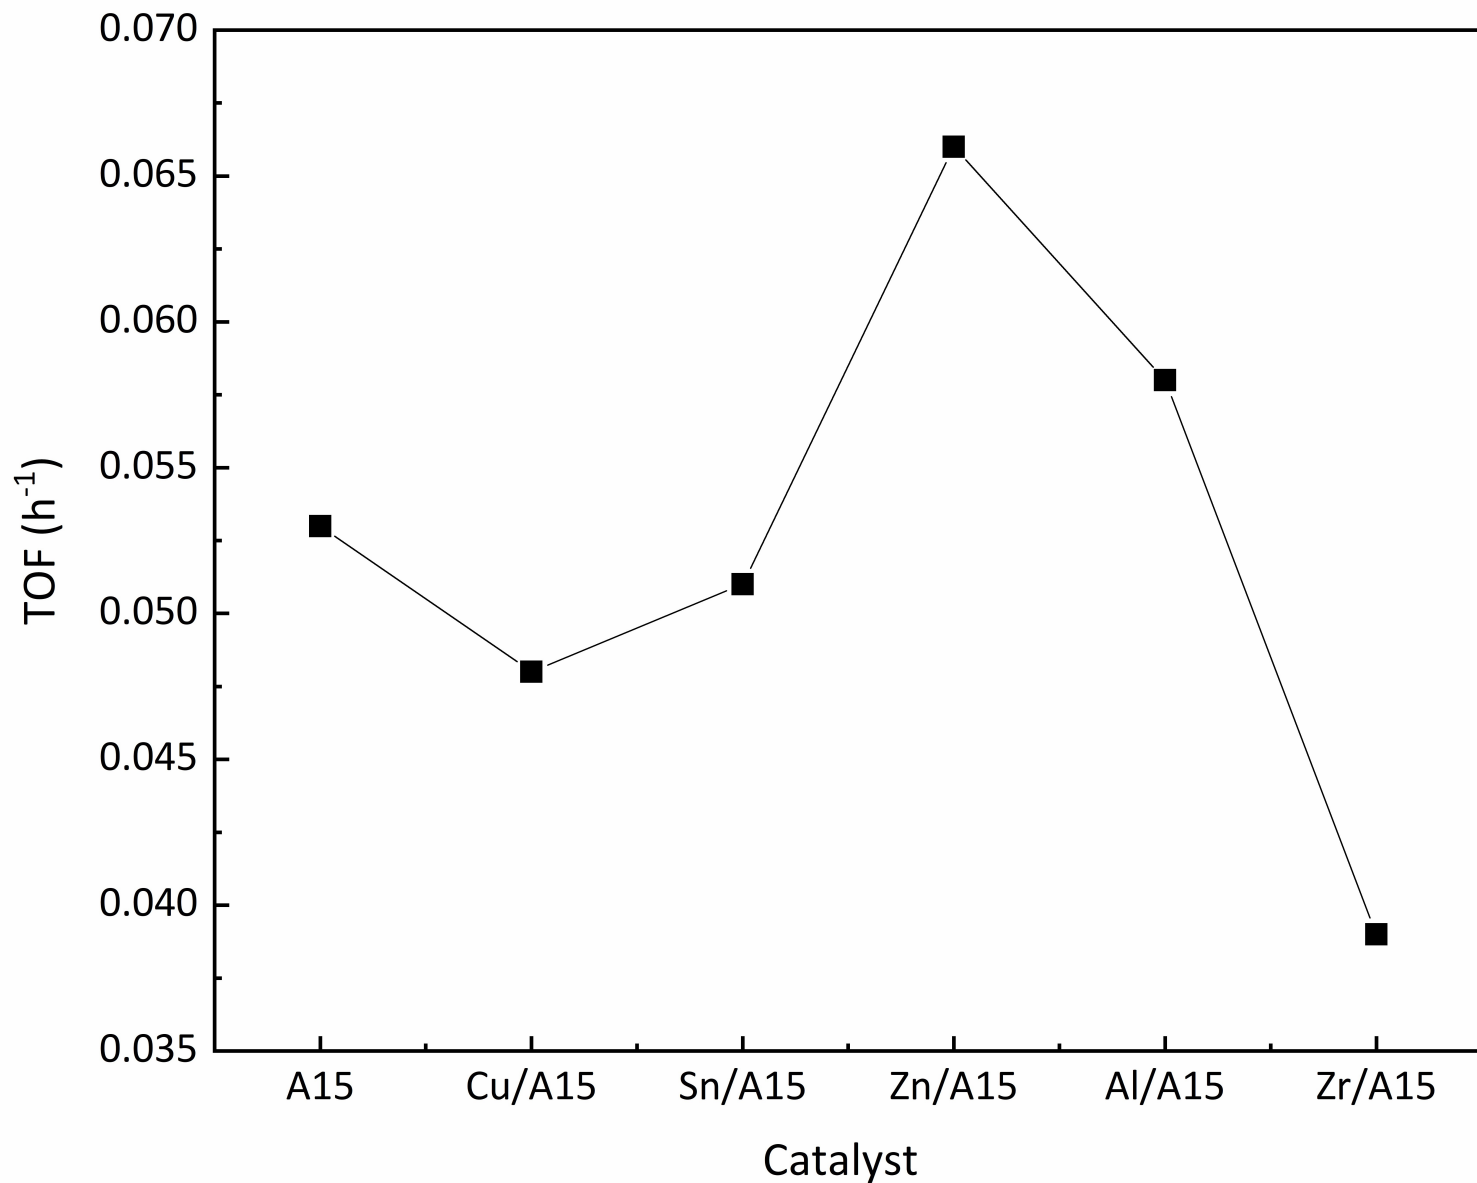

Supplement: d1se01738a3.pdf [file d1se01738a3.pdf]

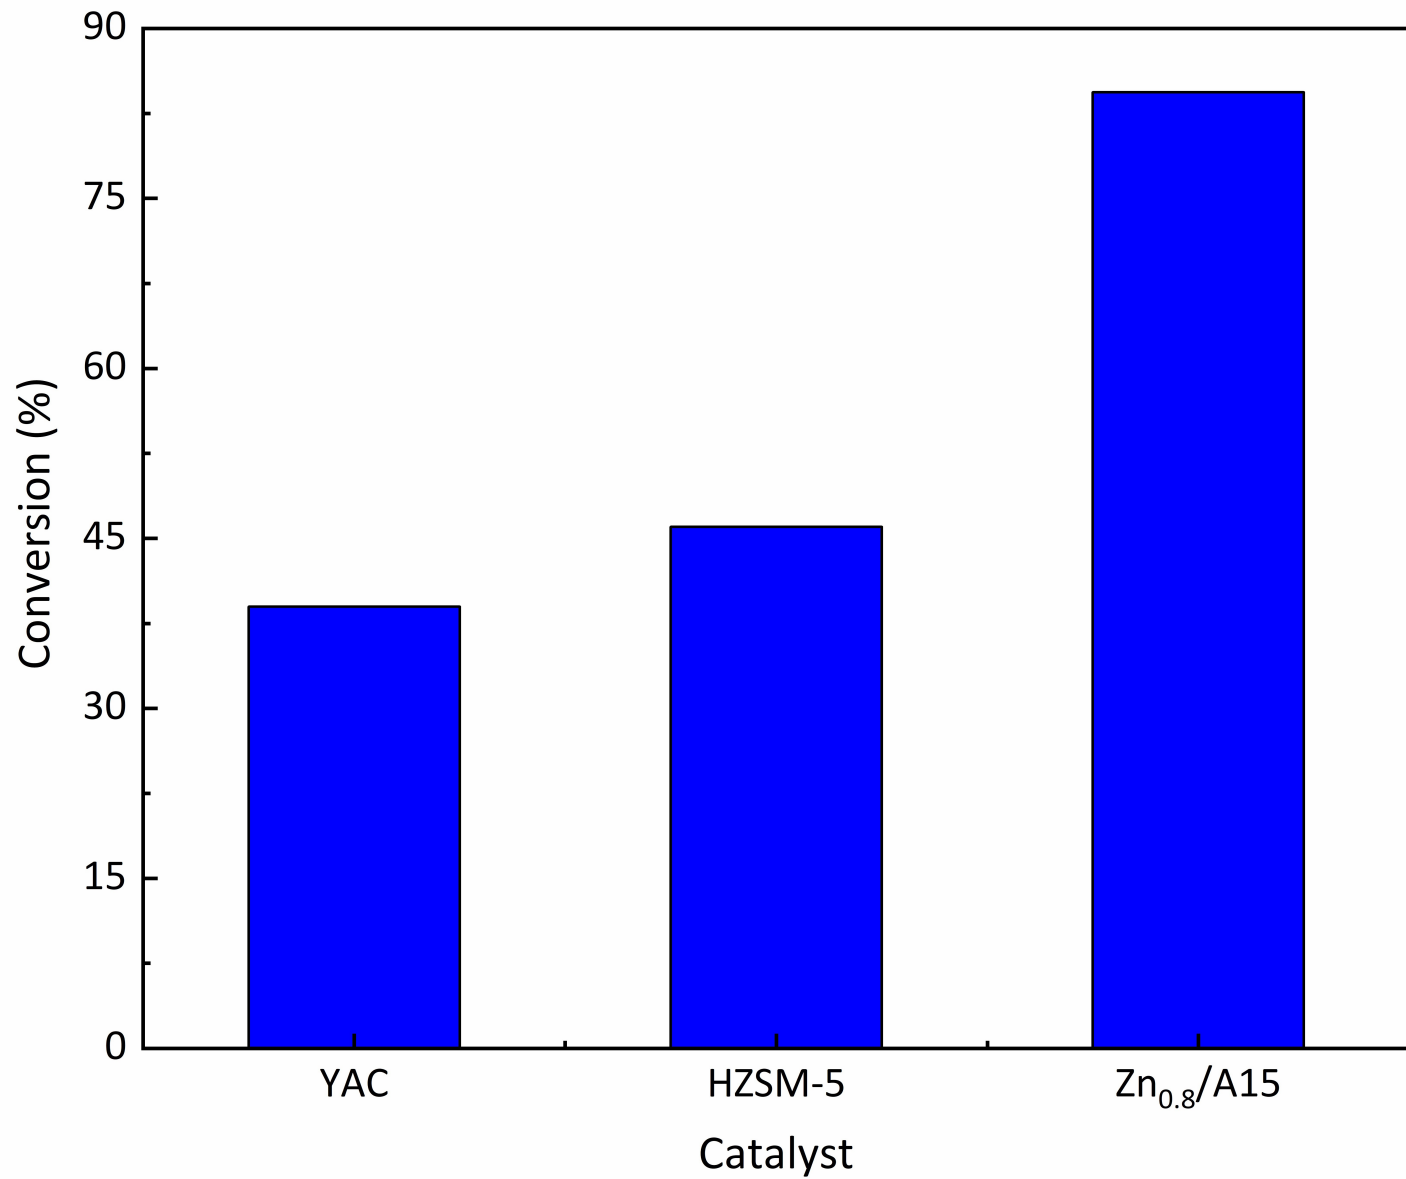

Supplement: d1se01738a4.pdf [file d1se01738a4.pdf]

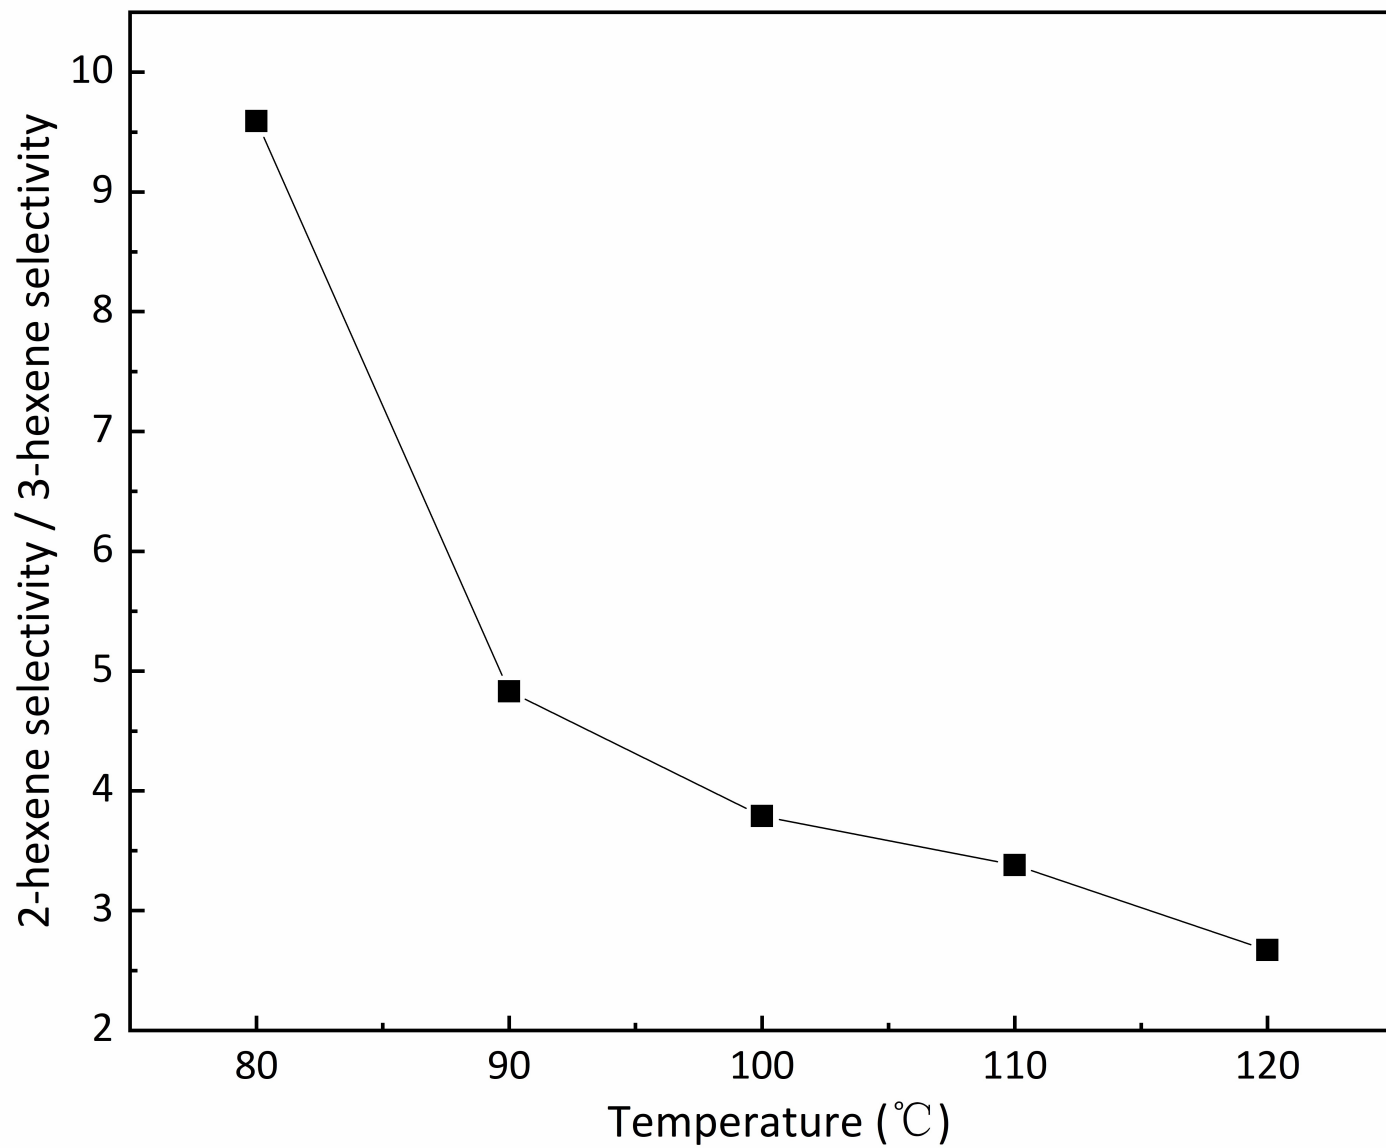

Supplement: d1se01738a5.pdf [file d1se01738a5.pdf]

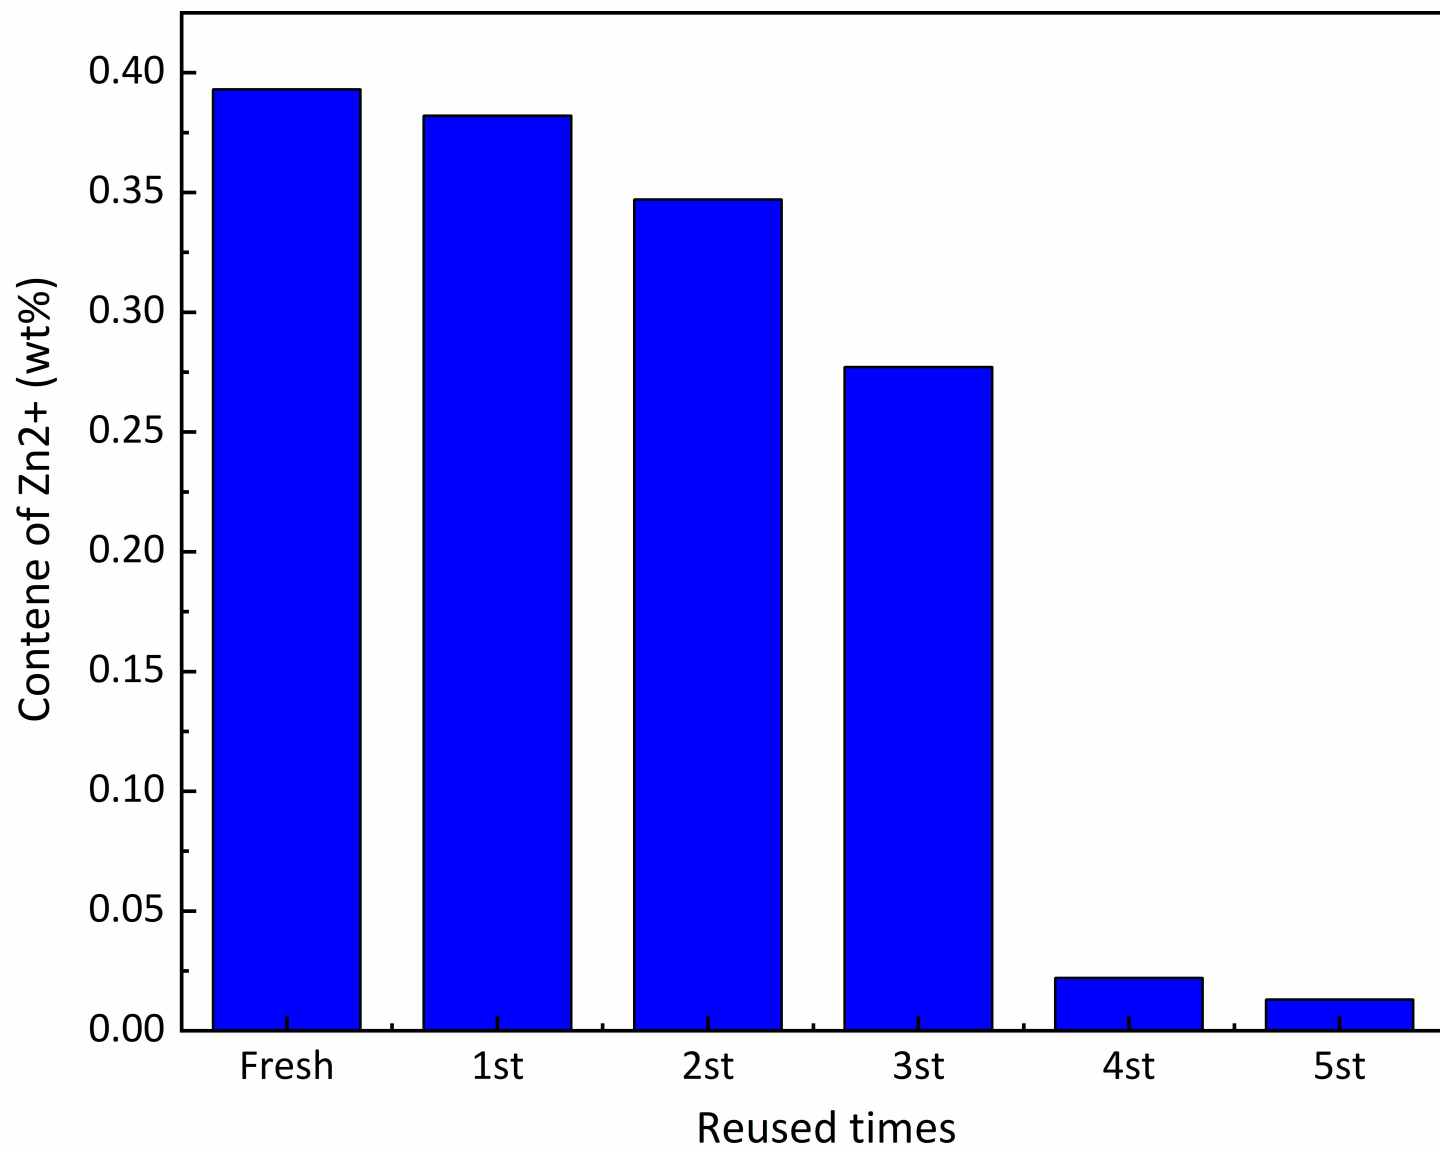

Supplement: d1se01738a6.pdf [file d1se01738a6.pdf]

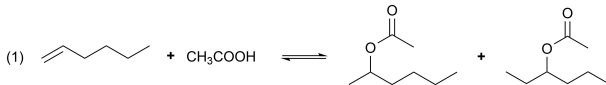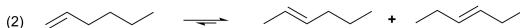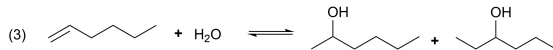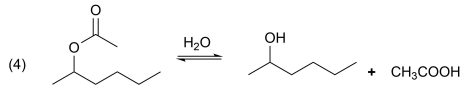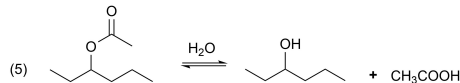

Supplement: d1se01738a8.pdf [file d1se01738a8.pdf]
